1 Title: **Hippocampal place cells as a cryptographic tool that enables**  
2 **animals to secretly cache and retrieve their food**

3

4 **Authors:**

5 Oren Forkosh<sup>1,2</sup>

6

7 **Affiliations:**

8 <sup>1</sup> Department of Cognitive and Brain Sciences, The Hebrew University of Jerusalem,  
9 Jerusalem, Israel

10 <sup>2</sup> Department of Animal Sciences, The Hebrew University of Jerusalem, Rehovot, Israel

11

12 **Abstract**

13 For animals, the ability to hide and retrieve valuable information, such as the location of  
14 food, can mean the difference between life and death. Here, we propose that to achieve  
15 this, their brain uses spatial cells similarly to how we utilize encryption for data security.  
16 Some animals are able to cache hundreds of thousands of food items annually by each  
17 individual and later retrieve most of what they themselves stashed. Rather than memorizing  
18 their cache locations as previously suggested, we propose that they use a single  
19 cryptographic-like mechanism during both caching and retrieval. The model we developed  
20 is based on hippocampal spatial cells, which respond to an animal's positional attention,  
21 such as when the animal enters a specific region (place-cells) or gazes at a particular  
22 location (spatial-view-cells). We know that the region that activates each spatial cell remains  
23 consistent across subsequent visits to the same area but not between areas. This  
24 remapping, combined with the uniqueness of cognitive maps, produces a persistent crypto-  
25 hash function for both food caching and retrieval. We also show that the model stores  
26 temporal information that helps animals in food caching order preference as previously  
27 observed. This behavior, which we refer to as crypto-taxis, might also explain consistent  
28 differences in decision-making when animals are faced with a large number of alternatives  
29 such as in foraging.

30

31

## 32 Main Text

33

34 Animals have much to hide. Some species evade potential predators or prey by finding cover  
35 or by using camouflage (1), mimicry, and other means of disguise (2). Others conceal their  
36 eggs or offspring, mask an illness or an injury to avoid being targeted by predators (3), or  
37 stash valuable resources, such as food.

38

39 Scatter hoarding is probably the largest-scale manifestation of secretive behavior in the  
40 animal kingdom. Many species of animals engage in this behavior, which involves storing  
41 food at multiple cache sites to preserve it for times when food is scarce (4). Several bird  
42 species, such as the Siberian tit (*Poecile cinctus*), were observed to cache over 500,000 items  
43 per individual in one year (4). While much of the research on scatter hoarding was  
44 conducted on birds, this behavior is not specific to them (4): squirrels (5), chipmunks (6),  
45 and even foxes (7, 8) stash food for times of need. As caching sites cannot be defended, the  
46 success of this strategy is often contingent on an animal's ability to keep the stashes away  
47 from prying eyes and hard to find (5).

48

49 Once the valuables are stashed, scatter hoarders are faced with the considerable challenge  
50 of retrieving the hidden items. It was shown that hoarding birds do not randomly seek out  
51 cached food (9); rather, they mainly retrieve that which they had themselves hidden – a  
52 remarkable feat, especially given the large number of cache sites (10). In the 1950s, Olof  
53 Swanberg observed that almost 90% of Eurasian nutcracker (*Nucifraga caryocatactes*)  
54 excavation holes contained cracked nutshells, indicating successful retrievals (4). In one  
55 elegant experiment, Stevens and Krab attached tiny magnets to the legs of marsh tits  
56 (*Poecile palustris*) (12). The birds were then offered serially numbered peanuts labeled with  
57 a radioactive isotope, enabling the researchers to locate each bird's caching sites using a  
58 scintillation counter (13). Magnet detectors were placed at each location to detect the  
59 presence of marked birds. During the experiment, the birds retrieved about 25% of their  
60 own stored food, while none of the control caches (set up by the researchers) were  
61 activated. The actual retrieval rate was probably higher, but the experiment faced some  
62 technical hurdles (4).

63

64 The ability to retrieve items from cache sites depends on spatial information such as visual  
65 cues. In (14), black-capped chickadees (*Poecile atricapillus*) were placed in an enclosure and  
66 their food-caching behavior was tracked. Object rearrangement around the enclosure  
67 greatly impaired the chickadees' ability to find their cache sites; manipulation of prominent  
68 global landmarks (large cardboard cutouts and a poster) had a much stronger effect on the

69 birds' retrieval performance than small proximal objects (5-cm squares). Shifting objects by  
70 as little as 20 cm to the right significantly decreased the chickadees' ability to recover the  
71 food. Moreover, in almost 70% of the cases, the birds searched within 5 cm of the location  
72 implied by the more prominent landmarks, with a mean displacement of around 20 cm.  
73 Assuming this is approximately the caching resolution, the finding indicates that a small  
74 area of 10x10 meters can hold as much as 2,500 potential caching sites.

75

76 The hippocampus plays a central part in the remarkable cognitive feat of caching (9). This  
77 is not surprising, as the hippocampus is known to be involved in processing spatial  
78 information in the brain (11). A large subpopulation of neurons within the hippocampus in  
79 animals such as mice, rats, and bats exhibit *place-cell* behavior; that is, they increase in their  
80 spike rate in response to the animal's entering a specific region within a given site (usually,  
81 but not always, one region per cell). The region activating each place cell often changes  
82 when the animal moves to a new area, often in an unpredictable manner. However, if the  
83 animal returns to a site previously visited, the place cell's receptive fields also return to their  
84 previous arrangement, and this change happens practically instantaneously. This  
85 remapping of the receptive field within a given environment is mostly insensitive to  
86 landmark manipulations. In primates, we usually find a related type of cells referred to as  
87 spatial view cells. These cells respond remotely when an animal is gazing at a specific region,  
88 independently of the animal's location or head direction (12).

89

90 A well-known homolog to the mammalian hippocampus also exists in birds, with similar  
91 involvement in spatial and episodic memory (13). Hippocampus size in birds was found to  
92 correlate with birds' ability to stash food. Although the interpretation of this correlation is  
93 under debate (14, 15), animals that used more cache sites generally had a larger  
94 hippocampus than non-caching bird species (16, 17). In addition, even within the same  
95 species, the size of the hippocampus was found to be larger in individuals dwelling in  
96 harsher environments that makes them more dependent of the cached food (18). Moreover,  
97 hippocampal neurogenesis has a seasonal element and seems to correlate with caching  
98 activity throughout the year (19). For many years, the spatially responsive cells found in  
99 avian brains were less related to a fixed position in space and more related to the challenge  
100 the animal faced such as the position of a goal within a maze (20). Only very recently the  
101 existence of place cells was demonstrated in the tufted titmouse (*Baeolophus bicolor*) (21).

102

103 Taken together with the fact that the hippocampus is involved in memory, these  
104 observations have led researchers to hypothesize that caching requires some form of  
105 spatial and episodic memory (22).

106

107 Yet as birds and other animals need an internal mechanism to guide them to stash food in  
108 specific locations, the same mechanism can also be used to direct them to the exact same  
109 locations while retrieving the food in that area. Such a mechanism may serve as a mnemonic  
110 device (as suggested in (23)) or possibly replace the need for memory altogether. Such a  
111 pseudo-random approach is much simpler than remembering hundreds of thousands of  
112 stashing sites while still supporting all the existing empirical evidence. The guidance is  
113 based on prominent landmarks in the terrain, such as trees and rocks, which are not likely  
114 to substantially change over time, and can be used in the subsequent cache retrieval. And  
115 we already know of a specific set of neurons to be able to do precisely this – the previously  
116 mentioned hippocampal spatial cells. Spatial cells are unique to each individual, they assign  
117 scores and rankings (using spike rates) to different locations within each area, they persist  
118 over time, and remap when in the same area. We show how these properties allow animals  
119 to find their cache sites efficiently and secretly.

120

### 121 ***Cryptography in the brain***

122 A mechanism, or mapping, that can facilitate efficient hiding and retrieval of multiple cache  
123 sites without relying on memory would need to have several basic properties. From a  
124 theoretical perspective, the class of methods that achieve this is known as cryptographic-  
125 hashing functions (or crypto-hashes, for short), which, as the name suggests, are comprised  
126 of two components: hashing functions and cryptographic keys (24).

127

128 In this context, hashing refers to a class of functions that map arbitrarily complex data  
129 (images, texts, audio files, and others) to a fixed size lower-dimensional representation.  
130 Computer applications often use crypto-hashes to store objects into memory efficiently by  
131 mapping them directly to a memory location (a type of a mnemonic device). In the case of  
132 food caching, hashing can be used to map a set of landmarks within and around an area  
133 onto a selected caching site within that area (Figure 1A). Efficient hash functions are such  
134 that the probability of assigning different cues the same output is kept to a minimum; This  
135 property reduces the possibility of collisions and redundancies that can occur when two  
136 different inputs result in the same output. It also makes better use of all the available  
137 resources – in the case of animals allowing the use of the entire area for caching.

138

139 Unlike standard hash functions, crypto-hashes incorporate an additional entity – a private  
140 key that renders the mapping unique to the key owner (24). Assuming no two individuals  
141 have the same key, it also means that the mapping will result in unique caching sites within  
142 the same area (Figure 1B). Another valuable property of crypto-hashes is that it is often

143 difficult to infer the key from a small number of examples, so even if another animal finds  
144 several caches, it will not be able to deduce the location of all others.

145

146 A straightforward and biologically plausible realization of crypto-hashing is through a  
147 simple two-layer neural network model with sparse connectivity (Figure 1C; see  
148 supplementary information). The first layer, the input layer, represents the visual cues  
149 (landmarks) within a given patch of land (Figure 2A, 2B). The second layer is a 2D lattice of  
150 spatial neurons, in which each neuron points to a specific location in a given area (Figure  
151 2C). The firing rate of each spatial neuron corresponds to the likelihood of choosing its  
152 particular location as a caching site. The spatial neurons are sparsely innervated by the  
153 input neurons.

154

155 In our model, we set the number of connections to a constant, typically equivalent to the  
156 number of landmarks the model uses (usually four). This sparse connectivity helps maintain  
157 a low number of potential cache sites by the output layer. A simple equation can summarize  
158 the activity of each spatial neuron

159

$$C_{x_i, y_i} = \left| \sum_{x, y} w_{x, y}^i I_{x, y} \right|$$

160

161 where  $C_{x_i, y_i}$  is the score, or spike-rate, of the spatial neuron pointing to coordinate  $x_i, y_i$  of  
162 the output grid;  $I_{x, y}$  is the input from coordinates  $x, y$ ; and  $w_{x, y}^i$  represents the strength of  
163 the connectivity between  $I_{x, y}$  and  $C_{x_i, y_i}$ . The strength, or weight  $w_{x, y}^i$ , of the connections was  
164 assigned randomly at between one and minus-one. The inputs were also set in the range  
165 one and minus-one, where the absolute magnitude represents the landmark's prominence  
166 (one is very prominent and zero is designated as not noticeable). The sign represents the  
167 landmark type, for example positive values represent "trees", and negatives represent  
168 "rocks". The scores of the output neurons  $C_{x_i, y_i}$  effectively determine the probability of their  
169 target area to be used as a cache site. We use the absolute value to keep the outputs  
170 positive, although it has no computational benefit to the model. Nor is the choice to  
171 distinguish between two types of objects by allowing negative inputs.

172

173 This neural network is a crypto-hash function, as it fulfills the three essential properties: (1)  
174 It maps a complex terrain into a point with minimal overlapping probability across the  
175 terrain or (2) across subjects (Figure 3A, 3B), and (3) reconstructing or decrypting the  
176 mapping from examples is difficult. The third point stems from the fact that the connection  
177 to each output-layer neuron is chosen randomly and independently of the others. Thus it is  
178 effectively equivalent to holding a unique key for each neuron.

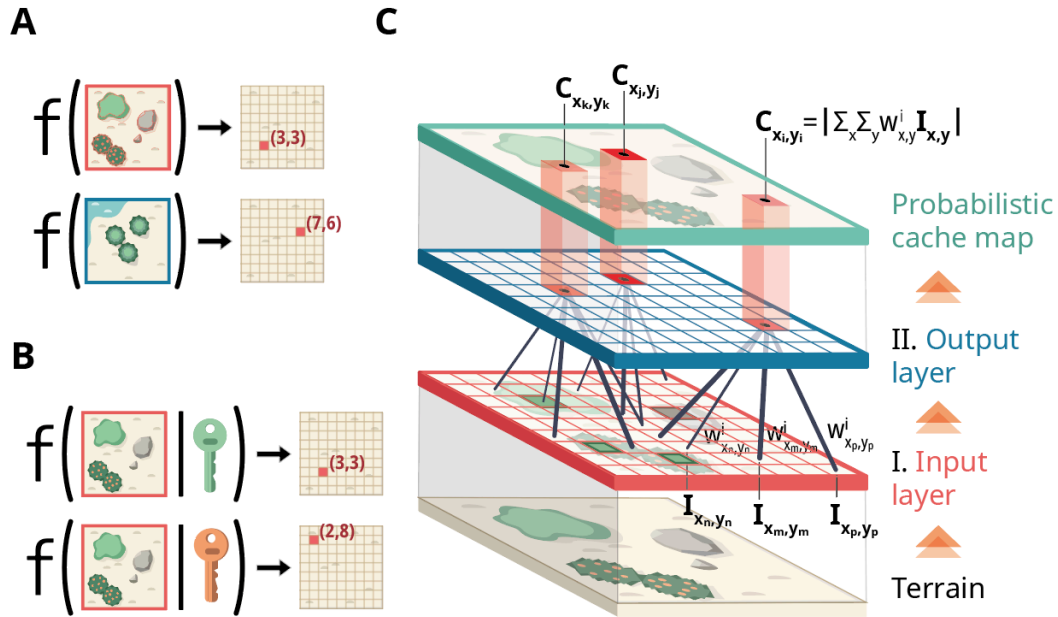

Figure 1. **Cryptographic mechanisms in the brain.** (A) Hash functions take high-dimensional objects (a map of a complex terrain, for example) and map them into a low-dimensional representation such as a point within that terrain. (B) Crypto-hash functions also include a private key that makes mapping the same object unique across individuals with different keys. (C) *Crypto-hashing in a two-layer neural network.* Each neuron  $I_{x,y}$  in the input layer represents landmarks within a small square area. We assume two types of landmarks, which we refer to as ‘trees’ and ‘rocks’. Neurons that point to trees are assigned a positive value, rocks get negative values, and if no object is within the neuron’s receptive field, it is set to zero. The absolute value of  $I_{x,y}$  corresponds to an object’s prominence; thus, prominent trees will get +1, smaller trees - 0.5, and small rocks may be assigned a value of - 0.3. The spatial output layer is a 2D mesh that assigns a caching score to each location within the site. The higher the score, the more likely this location would be used for caching. Each neuron in the output layer is innervated by a small number of input neurons. In all of our simulations, we matched this number to the number of landmarks the model uses.

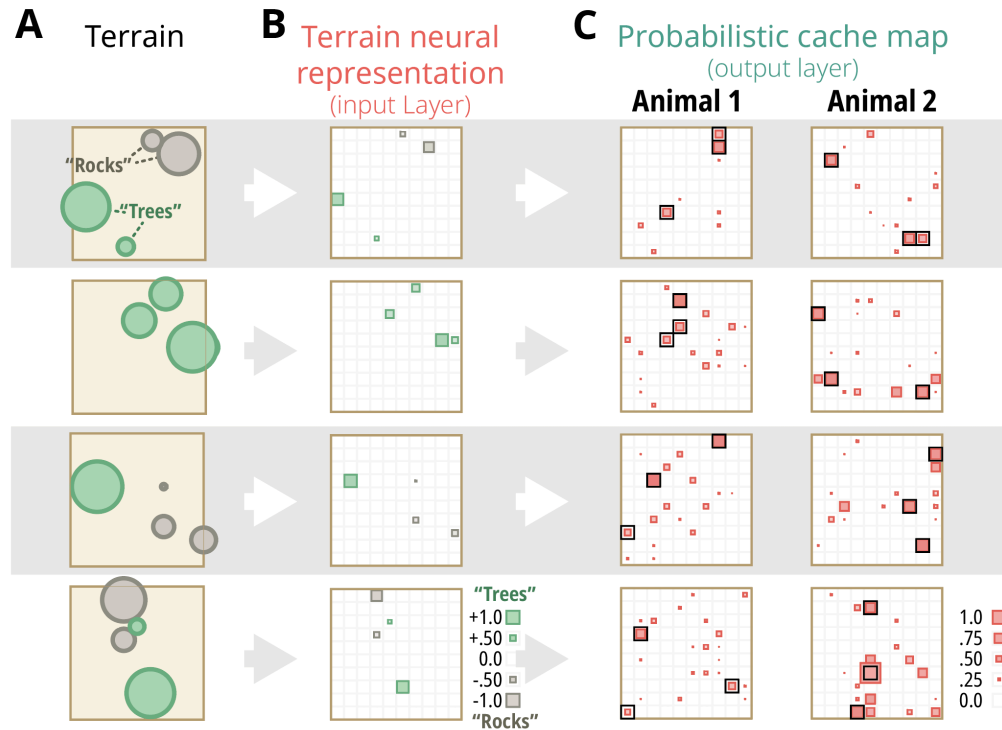

Figure 2. **Using spatial features to map cache sites without requiring brain plasticity.** (A-C) Four examples of the outcome of a crypto-hash neuronal network (in rows). (A) We simulated a terrain with four prominent landmarks by randomly choosing four cells within a 10x10 grid. The cells were assigned random values between -1 and +1, so that the absolute value represents the prominence of the spatial feature (cells with values close to +1 and -1 being the most prominent), and the sign represents the type of object. We refer to positive-valued cells as “trees” and negative cells as “rocks” for brevity. (B) The representation of the landscapes from (A) in the neural network’s input layer. The size of the colored inlaid boxes represents the object’s prominence and their color its sign (green for positive values or “trees”, and gray for negatives or “rocks”). (C) The output of the target layer of two randomly chosen neural networks (Animal 1 and 2) in response to the inputs in (B). The output layer creates a unique probabilistic map of possible cache sites.

179

180 The result can serve as a traditional crypto-hash function by choosing the target neuron  
181 with the highest score as the mapping outcome (see Materials and Methods). However, a  
182 probabilistic map with multiple outcomes of varying probabilities – apart from being more  
183 biologically feasible – also provides several benefits. The most straightforward benefit is  
184 that it allows for an arbitrary number of caching sites within each area by choosing the  
185 spatial neurons with the top scores.

186

187 Another valuable property of probabilistic maps is that they allow the addition of temporal  
188 considerations into caching behavior (22). Assuming the order of food recovery starts with

189 locations that have higher scores, items with higher nutritional values or perishable items  
 190 (such as dead insects, as opposed to seeds) could be stashed in places with higher scores –  
 191 making them more likely to be recovered prior to items assigned to lower-scored locations  
 192 (Figure 3C). In addition, avoiding previously excavated sites requires only memorizing the  
 193 score of the last excavated and choosing only sites with a lower score (we refer to this  
 194 behavior as bookmarking).

195  
 196 Finally, we did not address how mappings in the model are kept allocentric and invariant to  
 197 the animal's position. A straightforward approach to achieve such invariance was  
 198 suggested in an elegant paper about geometric hashing (25). The method there is based on  
 199 choosing two prominent objects in the area and using them to scale and align all landmarks.  
 200 The vector connecting the two most prominent landmarks defines the direction axis and  
 201 the distance between them sets the scale unit. Using this approach, we can obtain a model  
 202 that is insensitive to affine transformations.

203

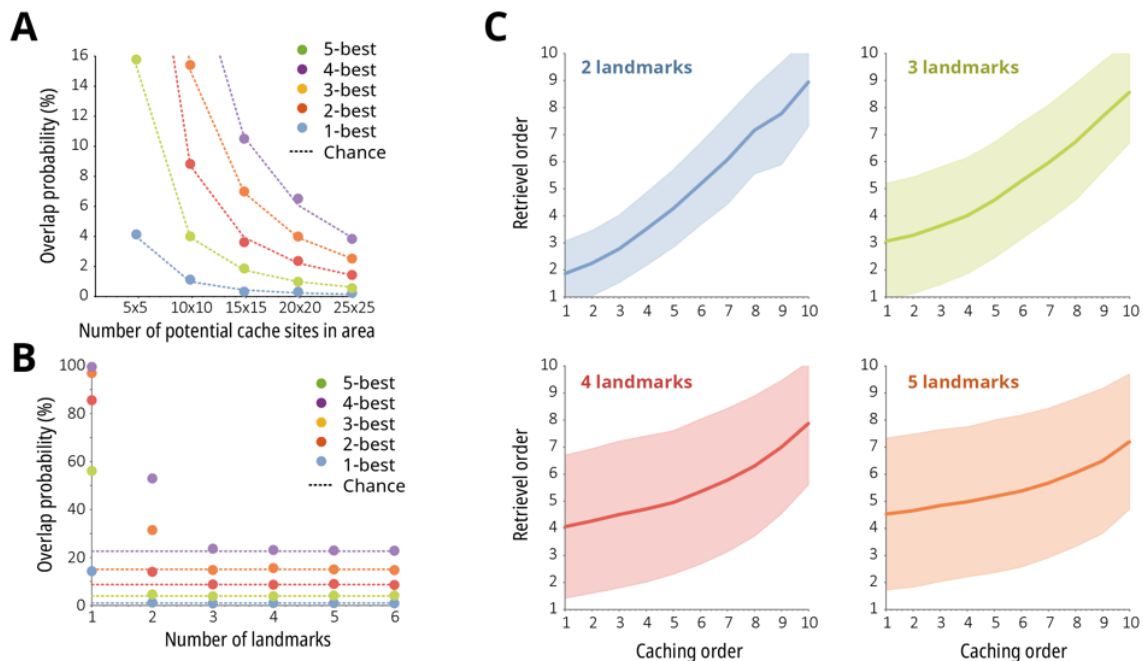

Figure 3. **Properties of a crypto-hash neural network.** The probability of overlapping sites between two random networks as a function of (A) potential cache sites and (B) the number of landmarks the network uses. The different colors correspond to the number of caches used in each area. The dotted lines are the overlap as expected from a random choice of sites. (C) *The probabilistic nature of the target layer scores allows the network to maintain temporal dynamics.* We assume that caching and retrieval order are determined by the target-layer score, from highest to lowest. If the choice is not absolute but probabilistic, we still get the same temporal dynamic in both phases. The shaded area around each line represents the standard deviation.

204



## 205 **METHODS**

### 206 **Landmarks and terrain**

207 While the algorithm is not sensitive to the number of landmarks, for the sake of simplicity,  
208 we assumed a fixed number of landmarks within each area - four, in this paper. These  
209 landmarks were divided into two categories, which we refer to as “trees” and “rocks”. The  
210 locations of the landmarks were chosen randomly and uniformly from an n-by-n square grid  
211 (in most cases we use n=10). Each landmark was then assigned a random value between  
212 minus one and one that signifies the objects category and prominence: Cells that have  
213 positive values are referred to as trees (values between zero and one), while rocks had  
214 negative numbers (between zero and minus one). The absolute value of each landmark  
215 signifies its prominence - so prominent trees have values closer to one and prominent rocks  
216 have values closer to minus one. Zero marks a no-object. The outcome is a sparse n-by-n  
217 matrix  $S_{n \times n}$  with values that vary between minus one and one.

218

### 219 **Crypto-Hash Functions**

220 Hash functions map data with arbitrary dimensions to a fixed-length value (24). In  
221 mathematical terms, a hash function  $g_p(\bar{s})$  is such that

222

223

$$g_p(\bar{s}) = \bar{y}_p$$

224

225 where  $\bar{s} \in S$  is a vector of arbitrary length, and  $\bar{y}_p = (y_1, y_2, \dots, y_p) \in \mathcal{Y}_p$  is a vector of a fixed-  
226 length  $p$ . Since the length of  $\bar{s}$  is often larger than that of  $\bar{y}_p$  hash-functions can be viewed  
227 as a special case of dimensionality-reduction.

228

229 An optimal hash function is such that the probability of mapping two inputs onto the same  
230 output is minimal, or, equivalently, that all outputs values should have (roughly) the same  
231 probability. This principal of uniformity can be formulated as

232

$$p(g_p(\bar{s}) = y) \approx \frac{1}{|\mathcal{Y}_p|}$$

233

234 where  $|\mathcal{Y}_p|$  is the cardinality (number of elements or size) of the set  $\mathcal{Y}_p$  of all possible output  
235 values. Because of their uniformity, hash functions are often used in data storage and  
236 retrieval tasks as they allow data access at nearly a constant time while requiring a storage  
237 size that is only slightly larger than the space needed to store the data itself.

237

238 Crypto-hash functions introduce an additional term, a private-key  $k$ , to the basic hash  
239 function

240

241 
$$g_p(\bar{s}; k) = \bar{y}_p.$$

242

243 The key ensures that the mapping is unique, i.e. the probability that the same inputs  
244 produce the same outputs for different keys is close to chance. Crypto-hash functions, like  
245 hash functions in general, are deterministic, meaning that the same combination of input  
246 and key will always produce the same output value. However, crypto-hash mappings are  
247 also one-way-functions, meaning that they are difficult to invert; knowing an output value  
248 gives very little information about the input or key.

249

### 250 **Crypto-Hash Neural Network**

251 Choice and retrieval of cache sites is based on prominent landmarks within a terrain.  
252 Assuming  $S_{n \times n}$  is the representation of the current area's terrain (see the 'simulated terrain'  
253 section), our crypto-hash function can be defined as

254

(1) 
$$g_p(S_{n \times n}; k) = (x, y)$$

255

256 where  $(x, y)$  is the cache coordinate within the area so that  $x, y \in \{1, \dots, n\}$ , and  $k$  is the crypto-  
257 key.

258

259 A straightforward and biologically plausible to achieve this is using a neural network. We  
260 define a two-layer network where, for simplicity, the neurons on both layers are organized  
261 as a grid with  $x, y$  indices. The value of each neuron in the first layer  $I_{x,y}$ , which is the input  
262 layer, is set according to the corresponding area tile or the  $(x, y)$ 'th cell in  $S_{n \times n}$ . Each output  
263 layer neuron  $C_{x_i, y_i}$  was sparsely connected to the input layer, and the weights  $w_{x,y}^i$  were  
264 randomly distributed between minus-one and one. The value of output neurons is the  
265 absolute value of the weighted sum of their inputs

(2) 
$$C_{x_i, y_i} = \left| \sum_{x,y} w_{x,y}^i I_{x,y} \right|.$$

266

267 In order to get a crypto-hash function in the form (1) we can take the index of the maximal  
268 value or

269

$$g_p(S_{n \times n}; k) = \underset{x', y'}{\operatorname{argmax}} C_{x', y'}.$$

270 In our case, a unique key  $k$  is obtained from the random choice of weights between the  
271 neural network's layers.

272

273 However, as we mentioned in the text, keeping the function as a probabilistic mapping like  
274 in (2) has several benefits and this is the form we use in the paper.

275

## 276 **DISCUSSION**

277

278 Although spatial cells, such as place cells have been extensively studied, the mechanism we  
279 presented is one of the few explanations to how the brain might utilize these cells. We  
280 proposed here that spatial cells can serve as the brain's crypto-hash functions, enabling  
281 animals to hide food in unique cache sites and later to retrieve it. So far, there has been no  
282 theory that explains what principles guide animals when choosing cache sites; If it was  
283 merely a question of optimality, all animals might end up choosing the same sites, which  
284 would lead to theft (or kleptoparasitism).

285

286 For brevity, we did not address how mappings in the model are kept allocentric and  
287 invariant to the animal's position. A straightforward approach to achieve such invariance  
288 was suggested in an elegant paper about geometric hashing (30). The method there is  
289 based on choosing the two most prominent objects in the area and using them to scale and  
290 align all landmarks. The vector connecting the two most prominent landmarks defines the  
291 direction axis and the distance between them sets the scale unit. Using this approach, we  
292 obtain a model that is insensitive to affine transformations (see supplementary  
293 information).

294

295 While our focus here is on scattered hoarding, a similar mechanism may also be involved in  
296 processes of decision making when the number of possibilities is large. A bee foraging for  
297 nectar and pollen, for example, would benefit from choosing flowers less likely to have been  
298 visited by other bees. The same function-driven mechanism (rather than memory-driven)  
299 may also help steer migratory animals back to previously used nesting areas. And since the  
300 hippocampus is involved in abstract knowledge in addition to spatial information (11), the  
301 scope of decision-making might be much broader; Since diversity is a key characteristic of  
302 all living system, it is tempting to think that humans' individualistic tendencies might also  
303 be somehow related to our proposed brain circuitry.

304

305 While the work we presented is theoretical, it raises some obvious predictions. First, that  
306 knowing the spiking patterns of spatial cells will enable us to determine cache site locations.  
307 Moreover, if we know the remapping between sites well, we can use it to decrypt the internal  
308 circuitry and predict cache sites in a new site that the animal is yet to visit. Finally, we predict

309 that the location of cache sites within a given area would be consistent across multiple hide  
310 and retrieval iterations.

311

312 The instinct to choose cache sites that are both unique and obscure has a clear evolutionary  
313 advantage. We therefore fondly suggest addressing this movement pattern as *cryptotaxis*  
314 and the neurons involved as *crypto-cells*.

315

316

### 317 **Acknowledgments**

318 We would like to send our love and appreciation to Prof. David Sherry from Western  
319 University for inspiring a large part of the idea for this paper with his beautiful works. We  
320 thank Shiri Gerson for her help, wonderful comments, and lots of support. We also thank  
321 Prof. Haim J. Wolfson for his help on the theory of hashing. Special thanks also to Prof. Anat  
322 Barnea for her invaluable introduction to the world of scatter hoarding and the avian  
323 hippocampus. We also thank Prof. Arnon Lotem for his insightful ideas, enthusiasm, and  
324 encouragement.

325

### 326 **Funding**

327 This work was supported by the Israeli Science Foundation (ISF; Grant 2505/20) and the Ring  
328 Center for Interdisciplinary Environmental Research.

329

### 330 **Competing interests**

331 Authors have no competing interests

### 332 **Data and materials availability**

333 All code is available online

334

335

336

337

338

## 339 Bibliography

340

341 1. M. Stevens, S. Merilaita, Animal camouflage: current issues and new perspectives.  
342 *Philosophical Transactions of the Royal Society B: Biological Sciences*. **364**, 423–427 (2009).

343 2. G. D. Ruxton, W. L. Allen, T. N. Sherratt, M. P. Speed, *Avoiding attack: the evolutionary*  
344 *ecology of crypsis, aposematism, and mimicry* (Oxford University Press, 2019).

345 3. R. K. Butler, D. P. Finn, Stress-induced analgesia. *Progress in Neurobiology*. **88**, 184–  
346 202 (2009).

347 4. C. C. Smith, O. J. Reichman, The Evolution of Food Caching by Birds and Mammals.  
348 *Annual Review of Ecology and Systematics*. **15**, 329–351 (1984).

349 5. L. F. Jacobs, E. R. Liman, Grey squirrels remember the locations of buried nuts. *Animal*  
350 *Behaviour*. **41**, 103–110 (1991).

351 6. R. H. Yahner, The Adaptive Nature of the Social System and Behavior in the Eastern  
352 Chipmunk, *Tamias striatus*. *Behavioral Ecology and Sociobiology*. **3**, 397–427 (1978).

353 7. N. Tinbergen, Von den Vorratskammern des Rotfuchses: (*Vulpes vulpes* L.)1.  
354 *Zeitschrift für Tierpsychologie*. **22**, 119–149 (1965).

355 8. D. W. MacDonald, Food caching by red foxes and some other carnivores. *Z*  
356 *Tierpsychol*. **42**, 170–185 (1976).

357 9. A. Brodin, The history of scatter hoarding studies. *Philos Trans R Soc Lond B Biol Sci*.  
358 **365**, 869–881 (2010).

359 10. T. A. Stevens, J. R. Krebs, Retrieval of stored seeds by Marsh Tits *Parus palustris* in the  
360 field. *Ibis*. **128**, 513–525 (1986).

361 11. T. E. J. Behrens, T. H. Muller, J. C. R. Whittington, S. Mark, A. B. Baram, K. L.  
362 Stachenfeld, Z. Kurth-Nelson, What Is a Cognitive Map? Organizing Knowledge for Flexible  
363 Behavior. *Neuron*. **100**, 490–509 (2018).

364 12. E. T. Rolls, Spatial view cells and the representation of place in the primate  
365 hippocampus. *Hippocampus*. **9**, 467–480 (1999).

366 13. E. D. Jarvis, O. Güntürkün, L. Bruce, A. Csillag, H. Karten, W. Kuenzel, L. Medina, G.  
367 Paxinos, D. J. Perkel, T. Shimizu, G. Striedter, J. M. Wild, G. F. Ball, J. Dugas-Ford, S. E. Durand,  
368 G. E. Hough, S. Husband, L. Kubikova, D. W. Lee, C. V. Mello, A. Powers, C. Siang, T. V.  
369 Smulders, K. Wada, S. A. White, K. Yamamoto, J. Yu, A. Reiner, A. B. Butler, Avian brains and  
370 a new understanding of vertebrate brain evolution. *Nature Reviews Neuroscience*. **6**, 151–159  
371 (2005).

372 14. T. C. Roth, A. Brodin, T. V. Smulders, L. D. LaDage, V. V. Pravosudov, Is bigger always  
373 better? A critical appraisal of the use of volumetric analysis in the study of the hippocampus.  
374 *Philos Trans R Soc Lond B Biol Sci*. **365**, 915–931 (2010).

375 15. D. F. Sherry, Neuroecology. *Annu Rev Psychol*. **57**, 167–197 (2006).

- 376 16. J. R. Krebs, D. F. Sherry, S. D. Healy, V. H. Perry, A. L. Vaccarino, Hippocampal  
377 specialization of food-storing birds. *Proc Natl Acad Sci U S A.* **86**, 1388–1392 (1989).
- 378 17. D. F. Sherry, A. L. Vaccarino, K. Buckenham, R. S. Herz, The hippocampal complex of  
379 food-storing birds. *Brain Behav Evol.* **34**, 308–317 (1989).
- 380 18. T. C. Roth, V. V. Pravosudov, Hippocampal volumes and neuron numbers increase  
381 along a gradient of environmental harshness: a large-scale comparison. *Proc Biol Sci.* **276**,  
382 401–405 (2009).
- 383 19. A. Barnea, F. Nottebohm, Seasonal recruitment of hippocampal neurons in adult  
384 free-ranging black-capped chickadees. *Proc Natl Acad Sci U S A.* **91**, 11217–11221 (1994).
- 385 20. D. F. Sherry, S. L. Grella, M. F. Guigueno, D. J. White, D. F. Marrone, Are There Place  
386 Cells in the Avian Hippocampus? *BBE.* **90**, 73–80 (2017).
- 387 21. H. L. Payne, G. F. Lynch, D. Aronov, Precise spatial representations in the  
388 hippocampus of a food-caching bird. *bioRxiv* (2020).
- 389 22. N. S. Clayton, A. Dickinson, Episodic-like memory during cache recovery by scrub jays.  
390 *Nature.* **395**, 272–274 (1998).
- 391 23. A. Barnea, F. Nottebohm, Patterns of food storing by black-capped chickadees  
392 suggest a mnemonic hypothesis. *Animal Behaviour.* **49**, 1161–1176 (1995).
- 393 24. C. Paar, J. Pelzl, Understanding Cryptography: A Textbook for Students and  
394 Practitioners (Springer Science & Business Media, 2009).
- 395 25. H. J. Wolfson, I. Rigoutsos, Geometric hashing: an overview. *IEEE Comput. Sci. Eng.* **4**,  
396 10–21 (1997).
- 397
- 398
